# Supplementary material
Source: PubMed Central journal article supplement (PMC7598062)

Fig. S1

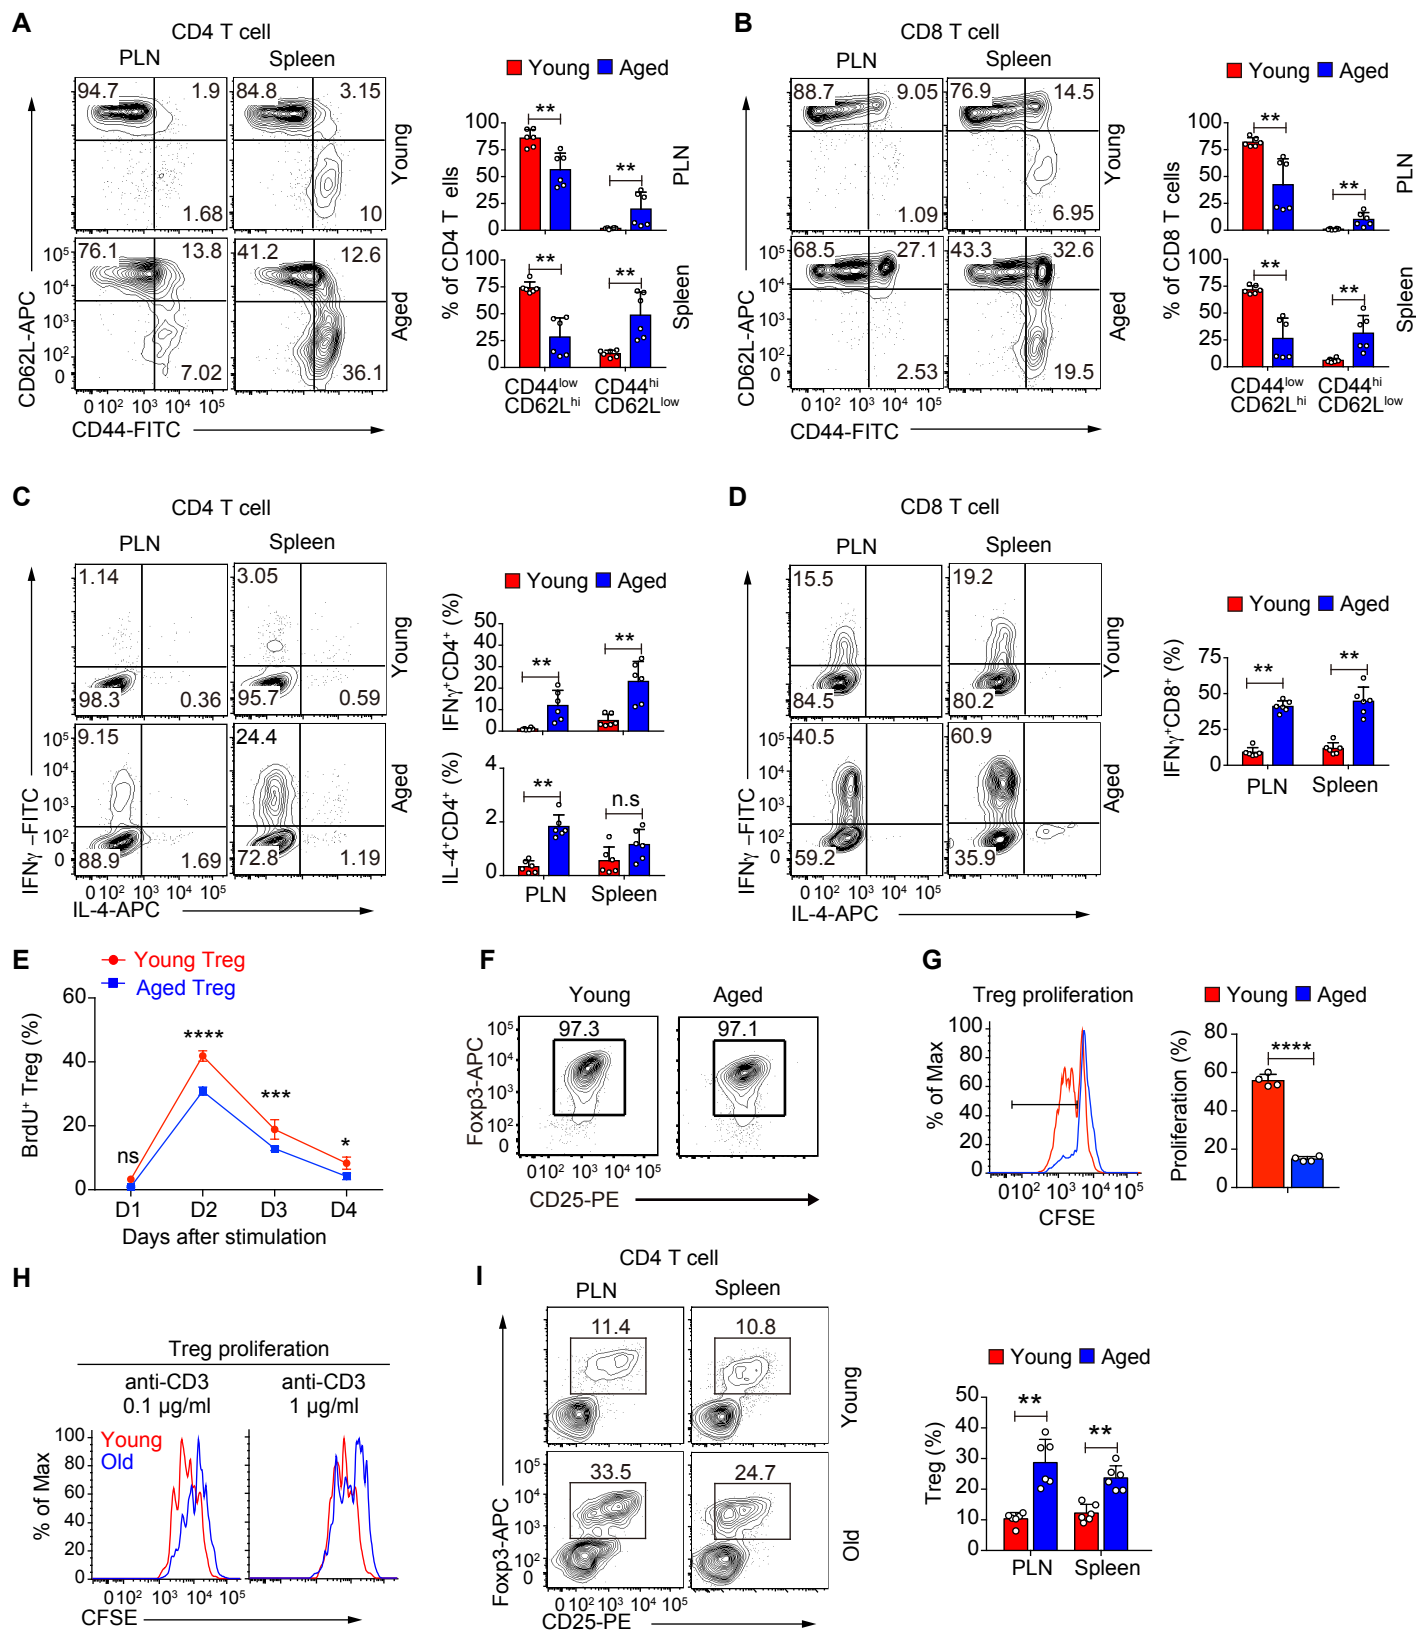

Fig. S2

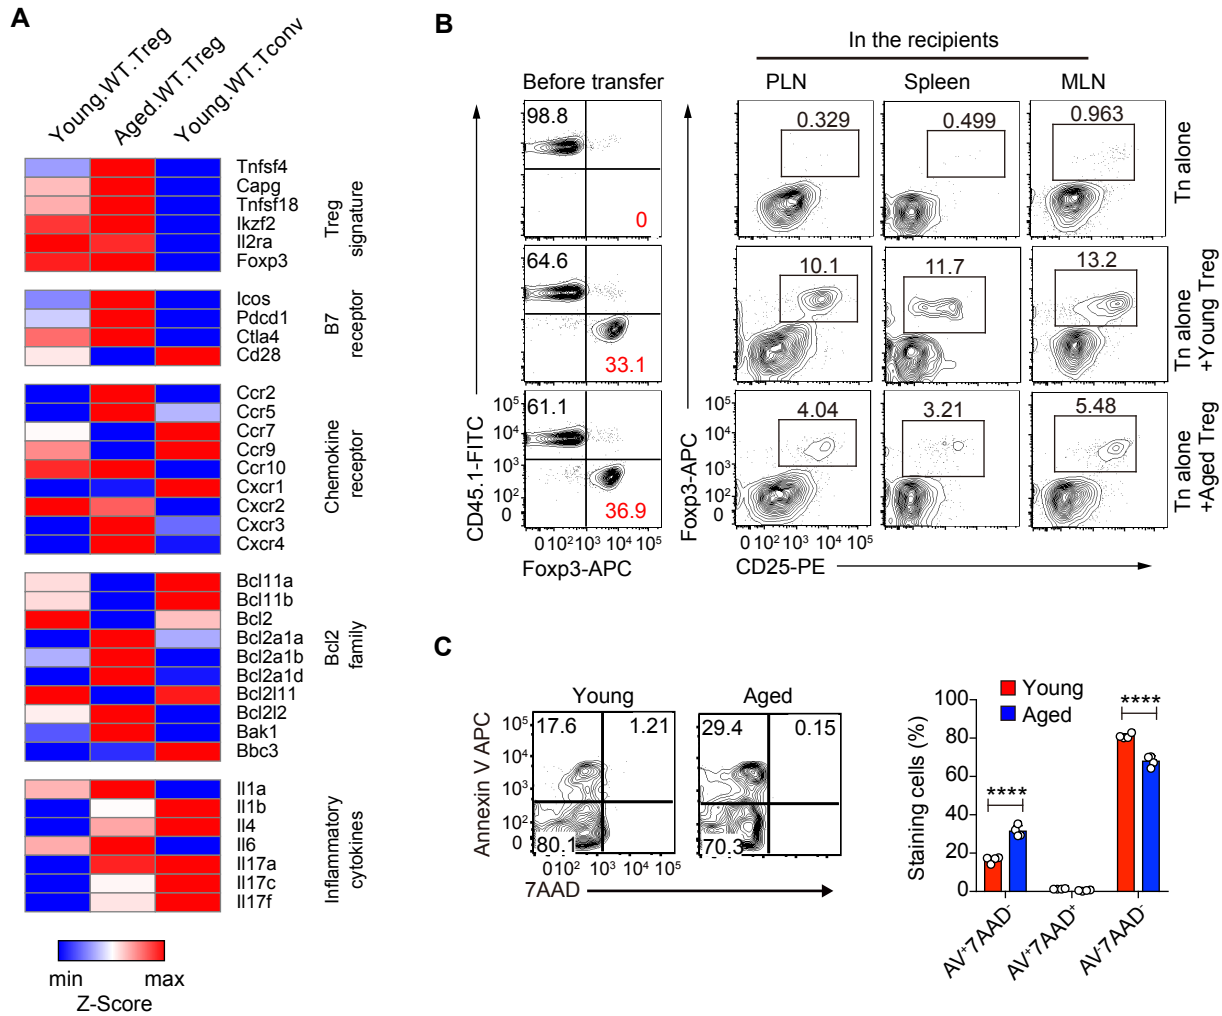

Fig. S3

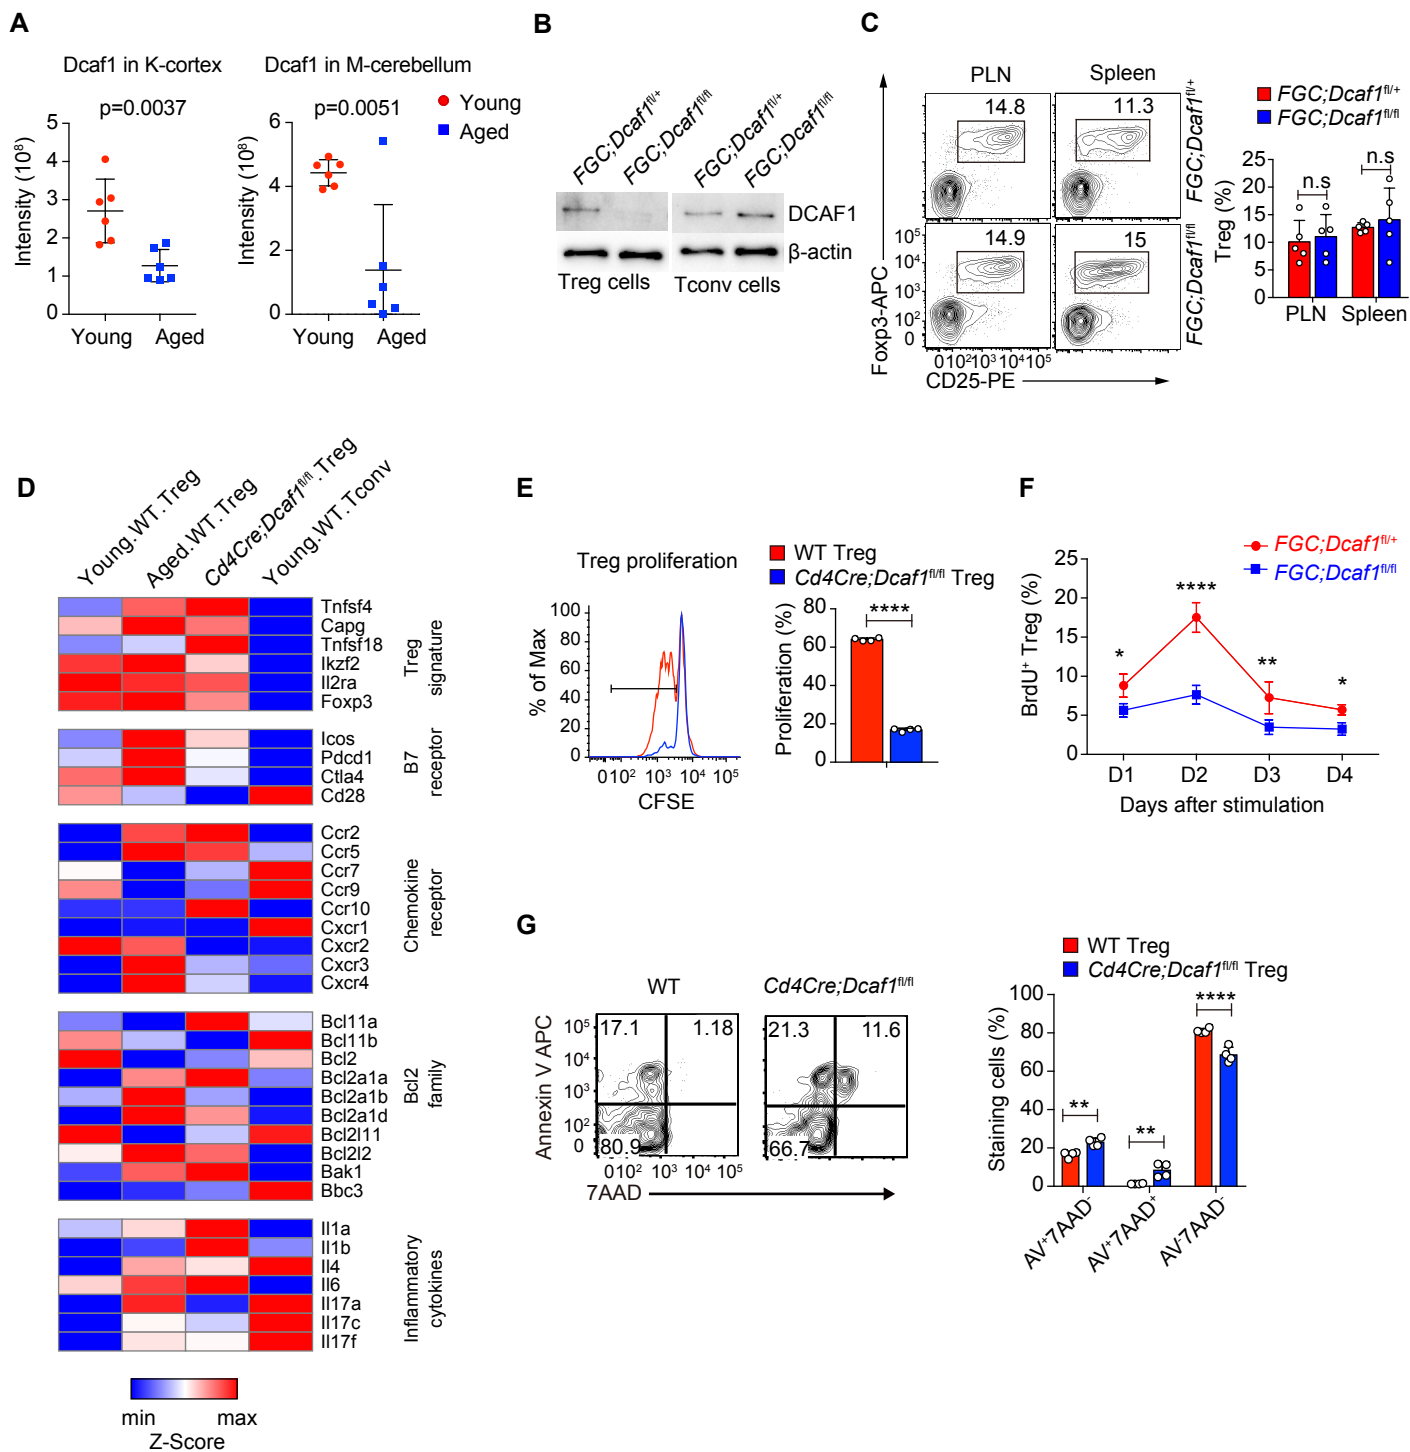

Fig. S4

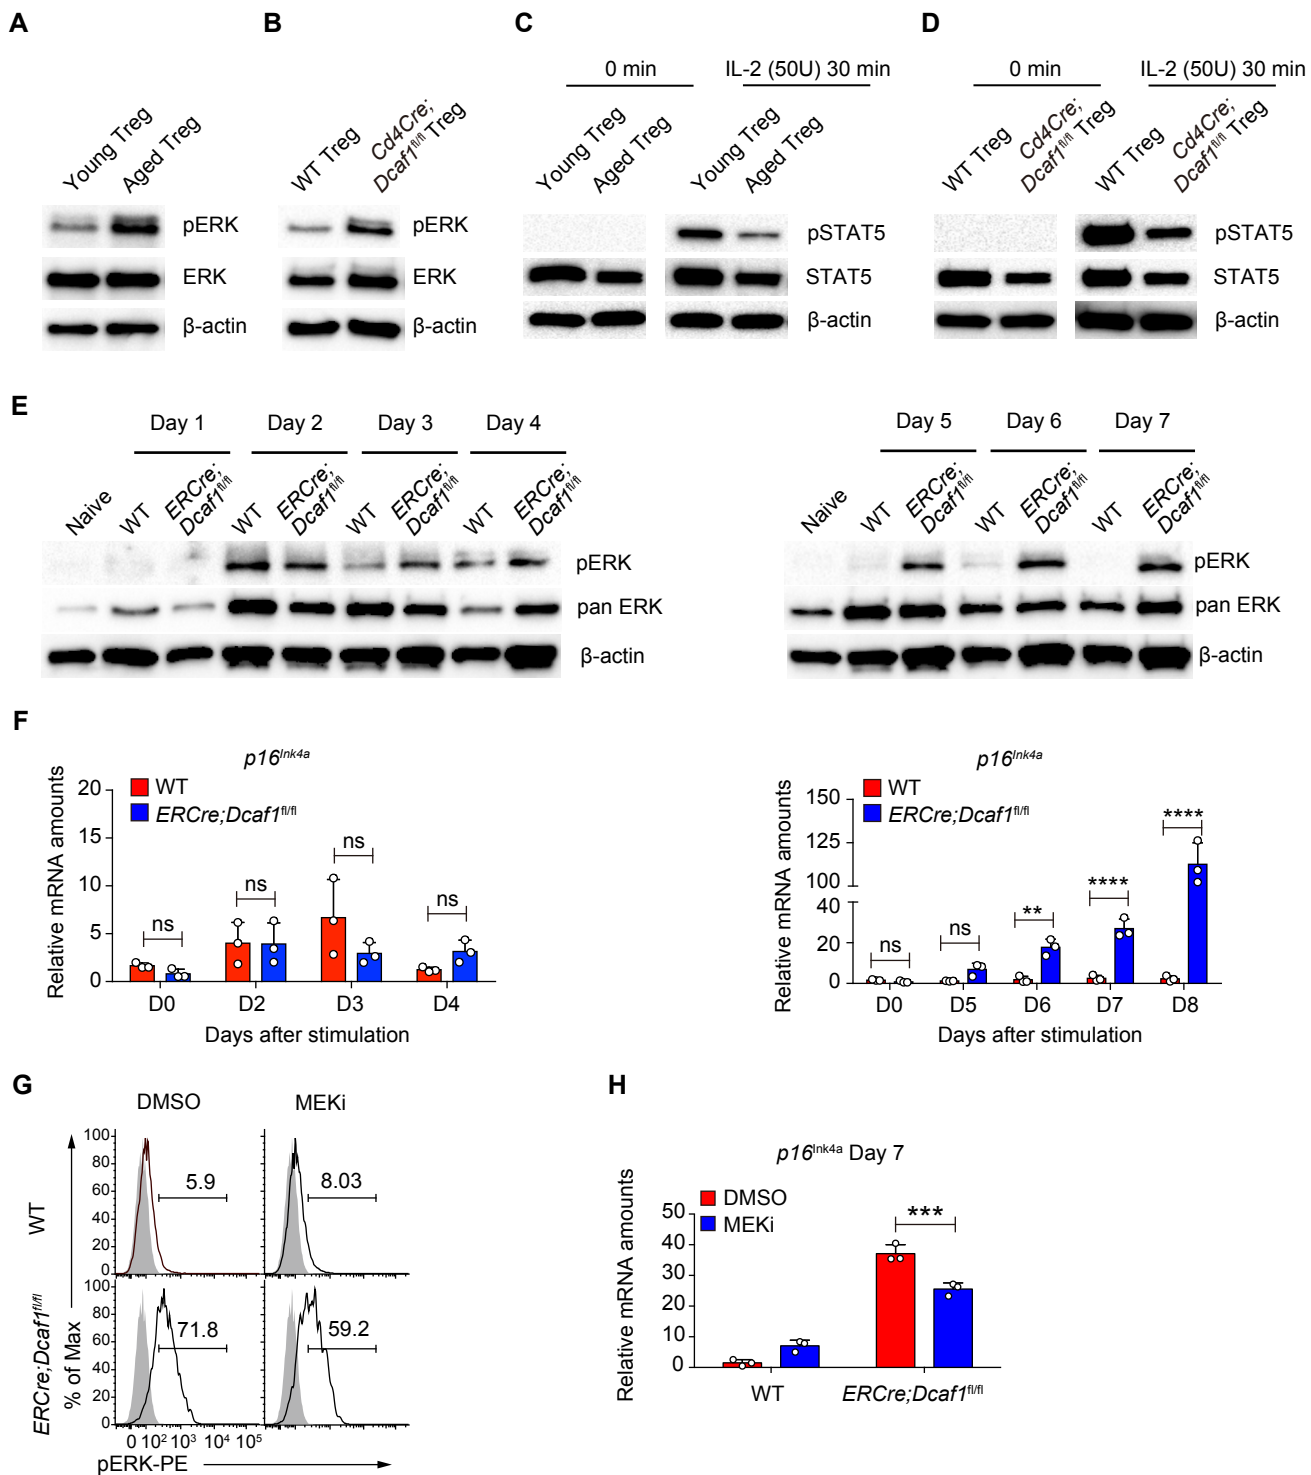

Fig. S5

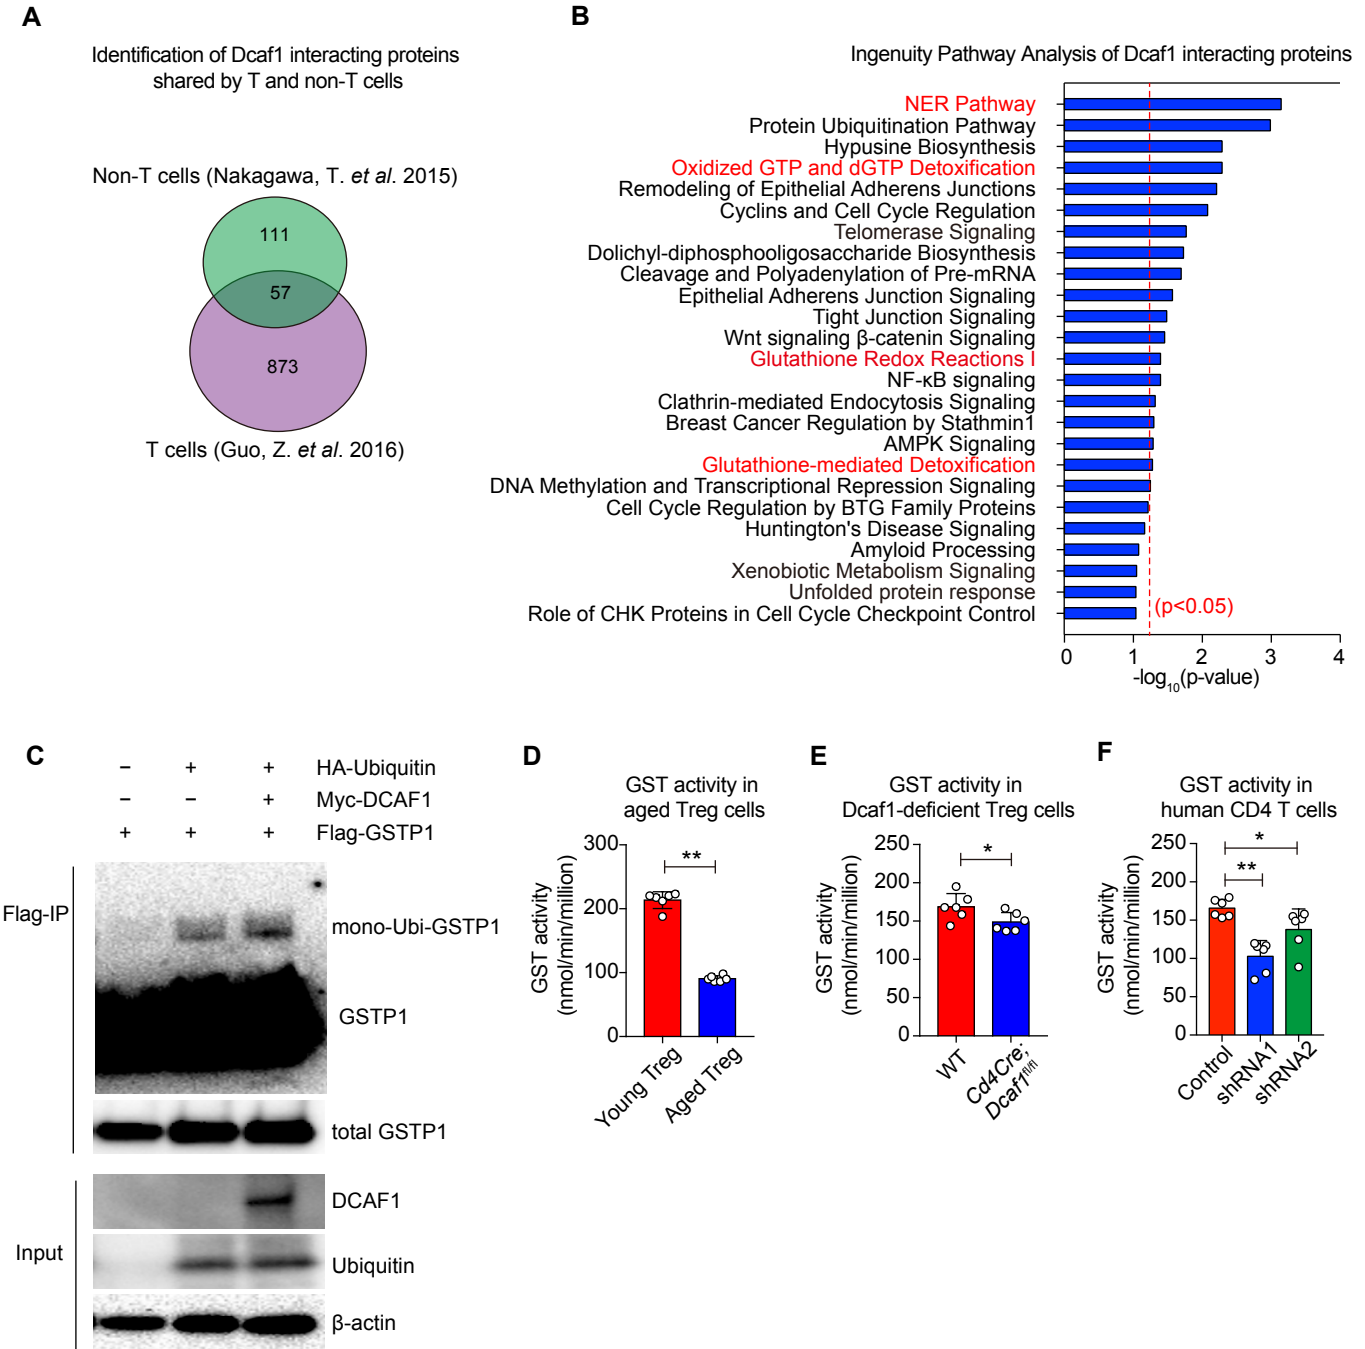

Fig. S6

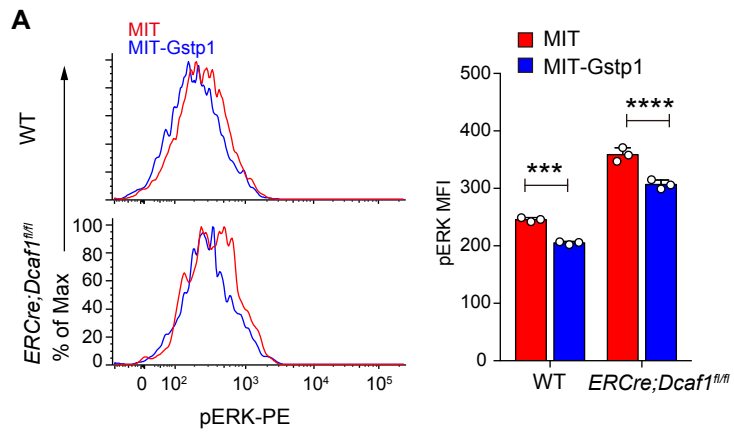

Fig. S7

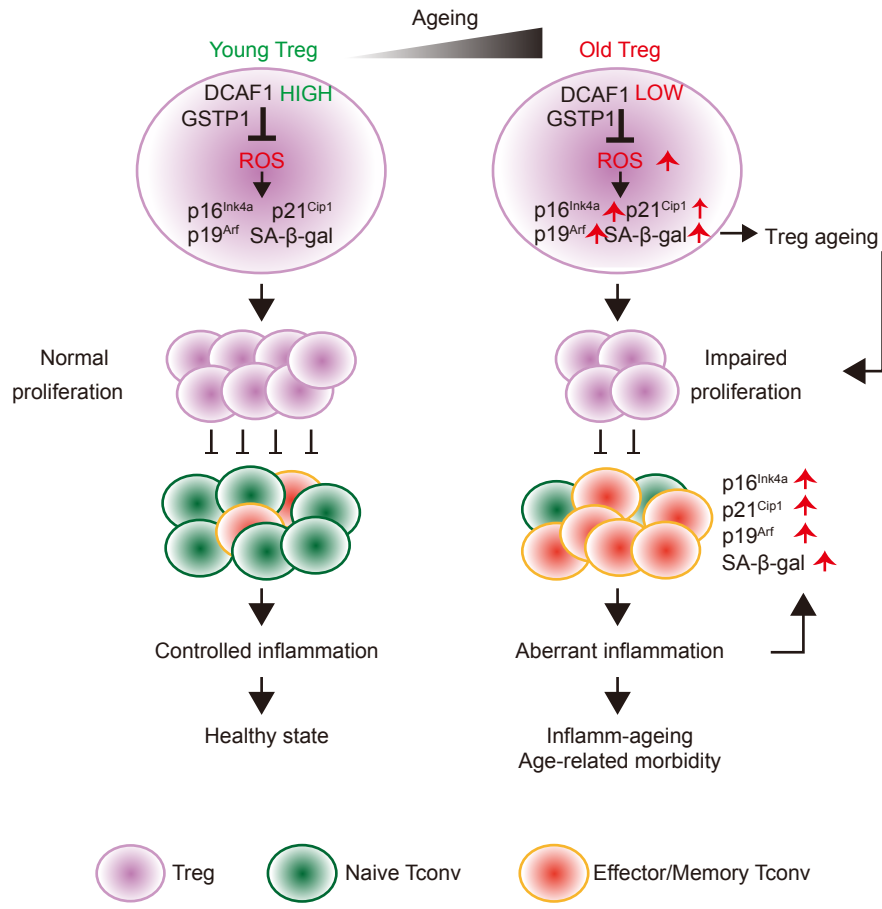

1. Full unedited gel for Figure 3A

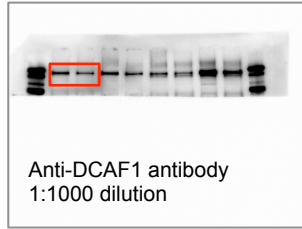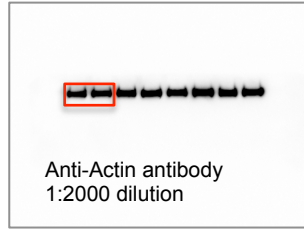

2. Full unedited gel for Figure 6A

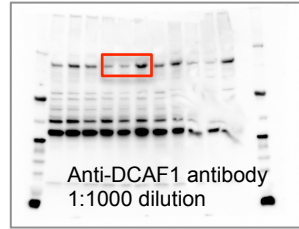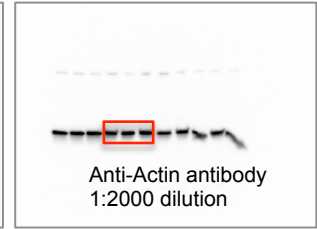

3. Full unedited gel for Figure 7F

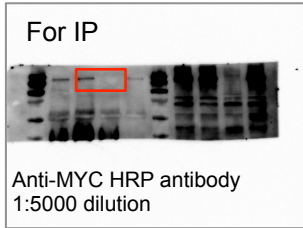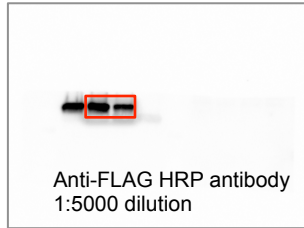

For Input, in separate membrane

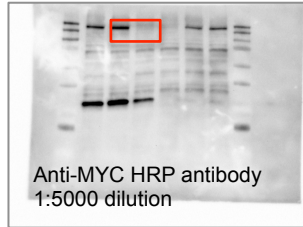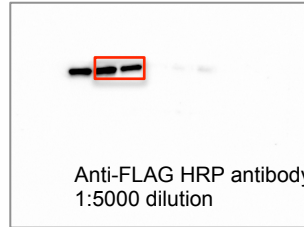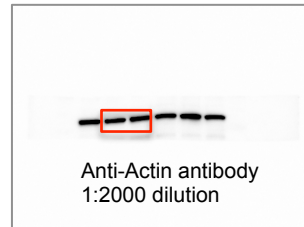

4. Full unedited gel for Figure 7G

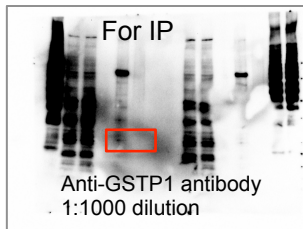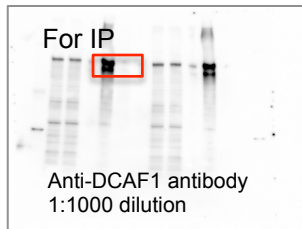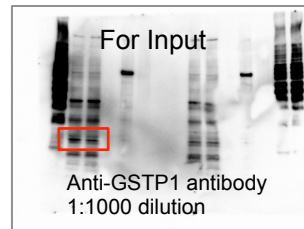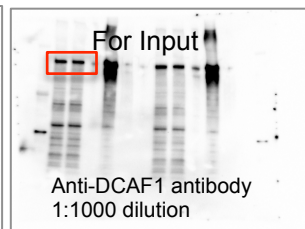

5. Full unedited gel for Figure S3B

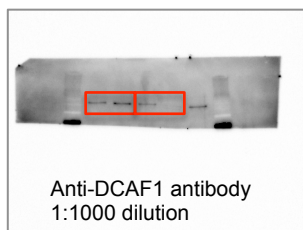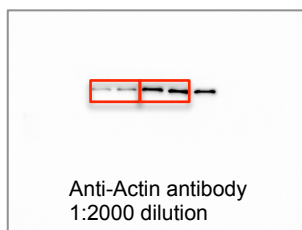

6. Full unedited gel for Figure S4A

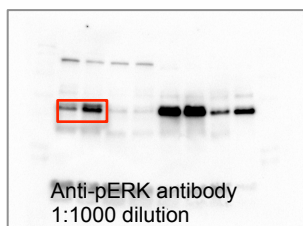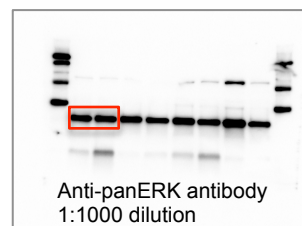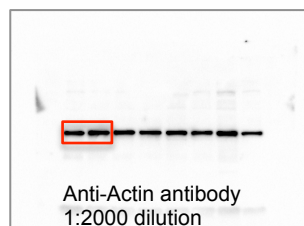



7. Full unedited gel for Figure S4B

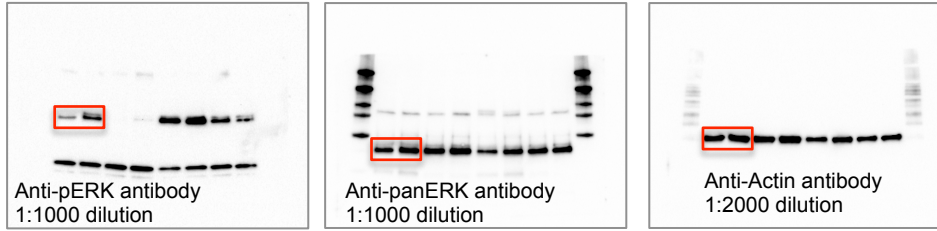

8. Full unedited gel for Figure S4C

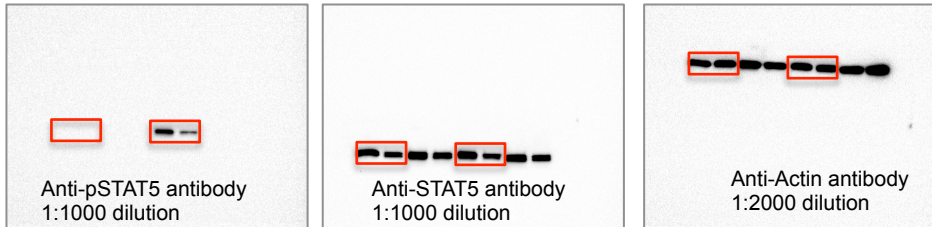

9. Full unedited gel for Figure S4D

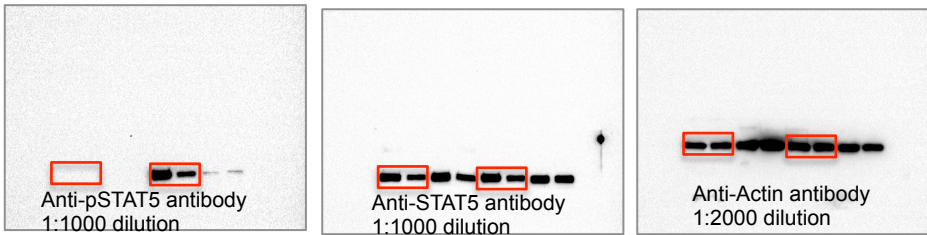

10. Full unedited gel for Figure S4E

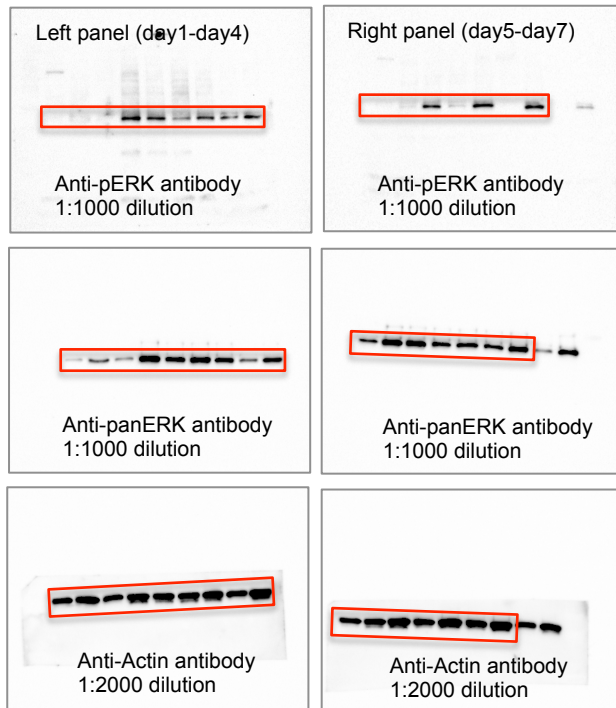

11. Full unedited gel for Figure S5C

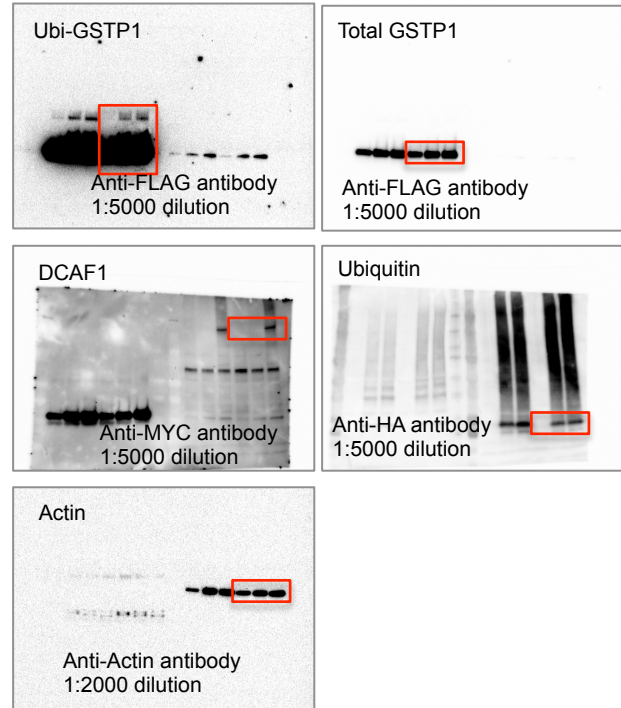

Supplement: jci-130-136466-s181.pdf [file jci-130-136466-s181.pdf]
